# Supplementary material for: A 2D Ag(I) layered coordination polymer based on pyridyl diphosphine: structure and selective sorption properties via weak C–H⋯F/O interactions
Source: Royal Society of Chemistry journal article supplement (doi:10.1039/b916921k), 2009-10-08
Supplement: b916921k.pdf [file b916921k.pdf]

**Electronic supplementary information:**

**A 2D Ag(I) layered coordination polymer based on pyridyl diphosphine: Structure and selective sorption properties via weak C–H···F/O interactions**

Xiaobing Wang, Jingzhi Feng, Jing Huang, Jianyong Zhang\*, Mei Pan and Cheng-Yong Su

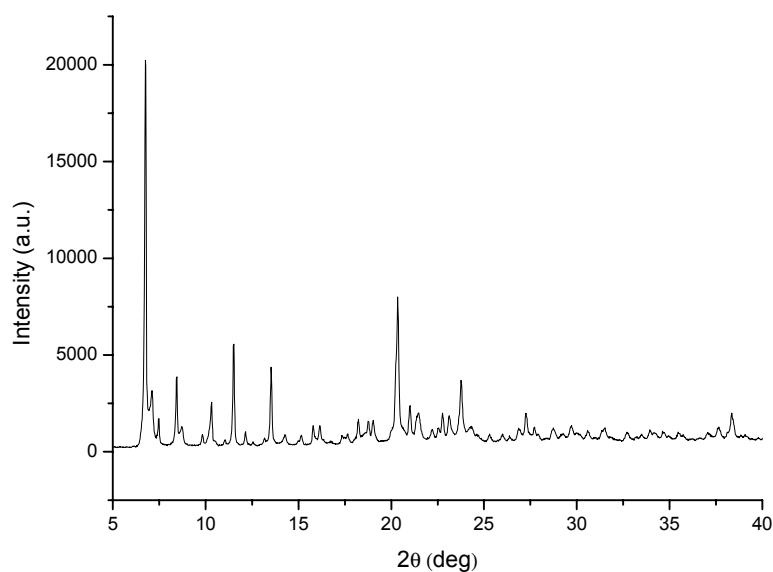

**Fig. S1** XRPD pattern of the white solid obtained by diffusion of Et<sub>2</sub>O vapour into the reaction mixture of L/CF<sub>3</sub>SO<sub>3</sub>Ag (1:1.5) in CHCl<sub>3</sub>–MeCN.

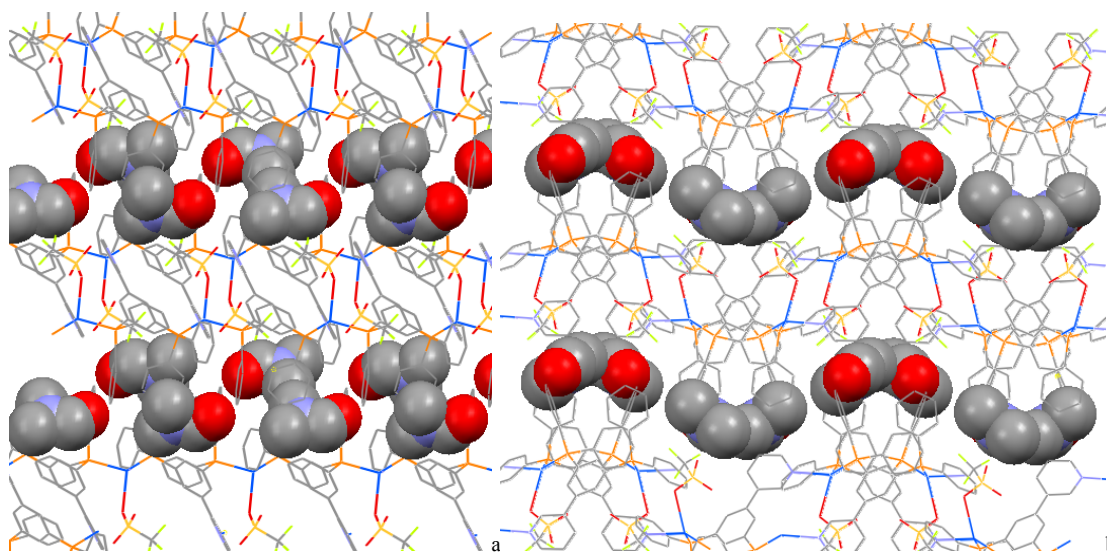

**Fig. S2** Views for [AgL(CF<sub>3</sub>SO<sub>3</sub>)]<sub>n</sub>·nDMF along the 2D layers.
